# Supplementary material
Source: MDPI journal article supplement (https://www.mdpi.com/2071-1050/13/1/318)
Supplement: s1 [file s1]

**Table S1:** Czech labels of origin and quality – producers perspective

|                                                                                                                               | Enterprise Size   |              |                   |              |                    |              |                   |              | Total    |              |
|-------------------------------------------------------------------------------------------------------------------------------|-------------------|--------------|-------------------|--------------|--------------------|--------------|-------------------|--------------|----------|--------------|
|                                                                                                                               | Micro Enterprises |              | Small Enterprises |              | Medium Enterprises |              | Large Enterprises |              | Abs. No. | Rel. No. (%) |
|                                                                                                                               | Abs. No.          | Rel. No. (%) | Abs. No.          | Rel. No. (%) | Abs. No.           | Rel. No. (%) | Abs. No.          | Rel. No. (%) |          |              |
| Bio*, Haná Regional Product**, PGI*                                                                                           | 0                 | 0.0%         | 0                 | 0.0%         | 1                  | 2.3%         | 0                 | 0.0%         | 1        | 1.0%         |
| Czech Food*                                                                                                                   | 0                 | 0.0%         | 2                 | 5.6%         | 1                  | 2.3%         | 0                 | 0.0%         | 3        | 2.9%         |
| Czech Food*, Bio*                                                                                                             | 3                 | 21.4%        | 2                 | 5.6%         | 1                  | 2.3%         | 0                 | 0.0%         | 6        | 5.9%         |
| Czech Food*, Klasa*                                                                                                           | 0                 | 0.0%         | 0                 | 0.0%         | 1                  | 2.3%         | 2                 | 25.0%        | 3        | 2.9%         |
| Czech Food*, Klasa*, Bio*                                                                                                     | 0                 | 0.0%         | 0                 | 0.0%         | 1                  | 2.3%         | 0                 | 0.0%         | 1        | 1.0%         |
| Czech Food*, Klasa*, Regional Food*                                                                                           | 0                 | 0.0%         | 1                 | 2.8%         | 5                  | 11.4%        | 0                 | 0.0%         | 6        | 5.9%         |
| Czech Food*, Regional Food*                                                                                                   | 0                 | 0.0%         | 0                 | 0.0%         | 1                  | 2.3%         | 0                 | 0.0%         | 1        | 1.0%         |
| PDO*, PGI*                                                                                                                    | 0                 | 0.0%         | 0                 | 0.0%         | 1                  | 2.3%         | 0                 | 0.0%         | 1        | 1.0%         |
| PGI*                                                                                                                          | 0                 | 0.0%         | 3                 | 8.3%         | 1                  | 2.3%         | 0                 | 0.0%         | 4        | 3.9%         |
| Klasa*                                                                                                                        | 0                 | 0.0%         | 3                 | 8.3%         | 10                 | 22.7%        | 3                 | 37.5%        | 16       | 15.7%        |
| Klasa*, Bio*                                                                                                                  | 0                 | 0.0%         | 2                 | 5.6%         | 2                  | 4.5%         | 0                 | 0.0%         | 4        | 3.9%         |
| Klasa*, Czech Guild Standards***, Czech Product – guaranteed by Federation of the Food and Drink Industries of the Czechia*** | 0                 | 0.0%         | 1                 | 2.8%         | 0                  | 0.0%         | 0                 | 0.0%         | 1        | 1.0%         |
| Klasa*, Haná Regional Product**                                                                                               | 0                 | 0.0%         | 0                 | 0.0%         | 0                  | 0.0%         | 1                 | 12.5%        | 1        | 1.0%         |
| Klasa*, PDO*                                                                                                                  | 0                 | 0.0%         | 0                 | 0.0%         | 1                  | 2.3%         | 0                 | 0.0%         | 1        | 1.0%         |
| Klasa*, Czech Product – guaranteed by Federation of the Food and Drink Industries of the Czechia***                           | 0                 | 0.0%         | 1                 | 2.8%         | 0                  | 0.0%         | 0                 | 0.0%         | 1        | 1.0%         |
| Klasa*, Regional Food*                                                                                                        | 0                 | 0.0%         | 3                 | 8.3%         | 8                  | 18.2%        | 0                 | 0.0%         | 11       | 10.8%        |
| Klasa*, Regional Food*, Bio*                                                                                                  | 0                 | 0.0%         | 1                 | 2.8%         | 2                  | 4.5%         | 0                 | 0.0%         | 3        | 2.9%         |
| Regional Food*                                                                                                                | 8                 | 57.1%        | 13                | 36.1%        | 8                  | 18.2%        | 2                 | 25.0%        | 31       | 30.4%        |
| Regional Food*, Bio*                                                                                                          | 1                 | 7.1%         | 1                 | 2.8%         | 0                  | 0.0%         | 0                 | 0.0%         | 2        | 2.0%         |
| Regional Food*, Poohří Regional Product**                                                                                     | 1                 | 7.1%         | 1                 | 2.8%         | 0                  | 0.0%         | 0                 | 0.0%         | 2        | 2.0%         |
| Regional Food* Šumava Original Product**                                                                                      | 1                 | 7.1%         | 0                 | 0.0%         | 0                  | 0.0%         | 0                 | 0.0%         | 1        | 1.0%         |
| Regional Food*, Kraj blanických rytířů Regional Product**, PGI*                                                               | 0                 | 0.0%         | 2                 | 5.6%         | 0                  | 0.0%         | 0                 | 0.0%         | 2        | 2.0%         |
|                                                                                                                               | 14                | 100.0%       | 36                | 100.0%       | 44                 | 100.0%       | 8                 | 100.0%       | 102      | 100.0%       |

Source: Authors.

Coordinators:

\* Ministry of Agriculture of the Czech Republic

\*\* ARB (Association of regional Brands), Asociace regionálních značek, z.s.

\*\*\* Federation of the Food and Drink Industries of the Czechia

**Table S2:** SWOT Analysis.

| <b>Strengths</b>     |                                                                                        | <b>Weaknesses</b> |                                                                                                          |
|----------------------|----------------------------------------------------------------------------------------|-------------------|----------------------------------------------------------------------------------------------------------|
| -                    | Funds to support the marketing activities                                              | -                 | Insufficient distribution possibilities for the labelled products                                        |
| -                    | Strong marketing communication                                                         | -                 | Overstatements about the labels' benefits leading to higher (unrealistic) expectations of food producers |
| -                    | Overall positive evaluation of the effect the labels have on the producers' businesses |                   |                                                                                                          |
| <b>Opportunities</b> |                                                                                        | <b>Threats</b>    |                                                                                                          |
| -                    | Czech customers show growing interest in the labelled food                             | -                 | Strong competition – high number of labelling systems                                                    |
| -                    | Czech customers are willing to pay a premium price for the labelled food               | -                 | Willingness of Czech food producers to apply for more labels at the same time                            |

Source: Authors.
